# Supplementary material for: Effects of a deep-rooted crop and soil amended with charcoal on spatial and temporal runoff patterns in a degrading tropical highland watershed
Source: Copernicus journal article supplement (doi:10.5194/hess-20-875-2016), 2016-02-24
Supplement: Supplementary file 1 [file hess-20-875-2016-supplement.pdf]

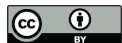

*Supplement of*

## **Properties of young contrails – a parametrisation based on large-eddy simulations**

**Simon Unterstrasser**

*Correspondence to:* S. Unterstrasser (simon.unterstrasser@dlr.de)

- acp-16-2059-2016-supplement-title-page.pdf
- contrail\_properties.f90

The copyright of individual parts of the supplement might differ from the CC-BY 3.0 licence.

1 **Supplementary Materials**

2 **Supplementary material A: Soil Map of the Anjeni Watershed**

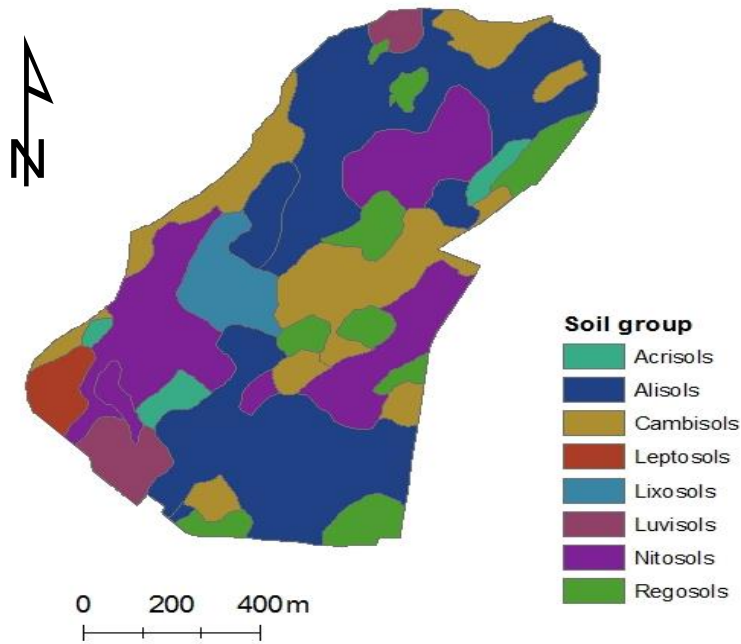

3

4 Figure S1. Soil map of the Anjeni watershed. Source (Zeleeke, 2000)

5

6

7

8

9

10

11

12

13

14

15

1 **Supplementary material B: Daily Plot Runoff Response**

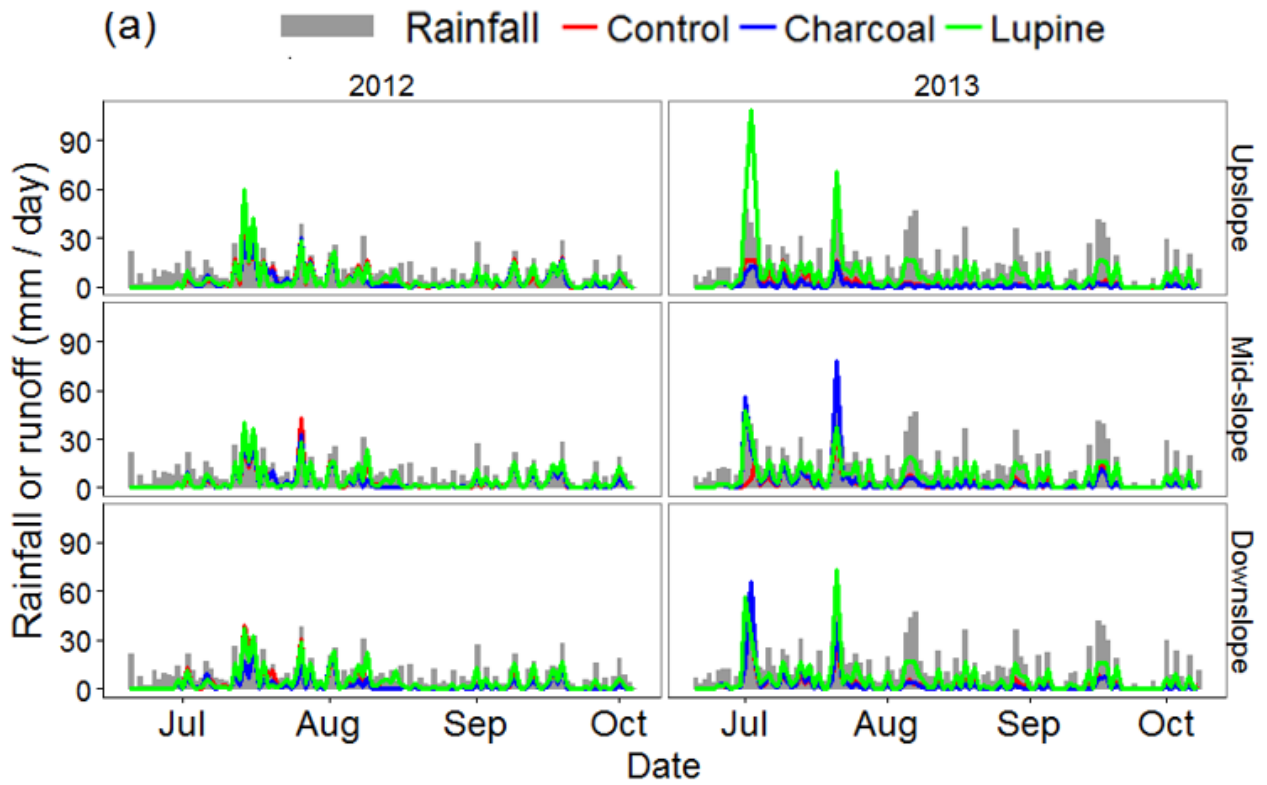

2

3 Figure S2. Daily rainfall versus runoff from plots along Transect 1

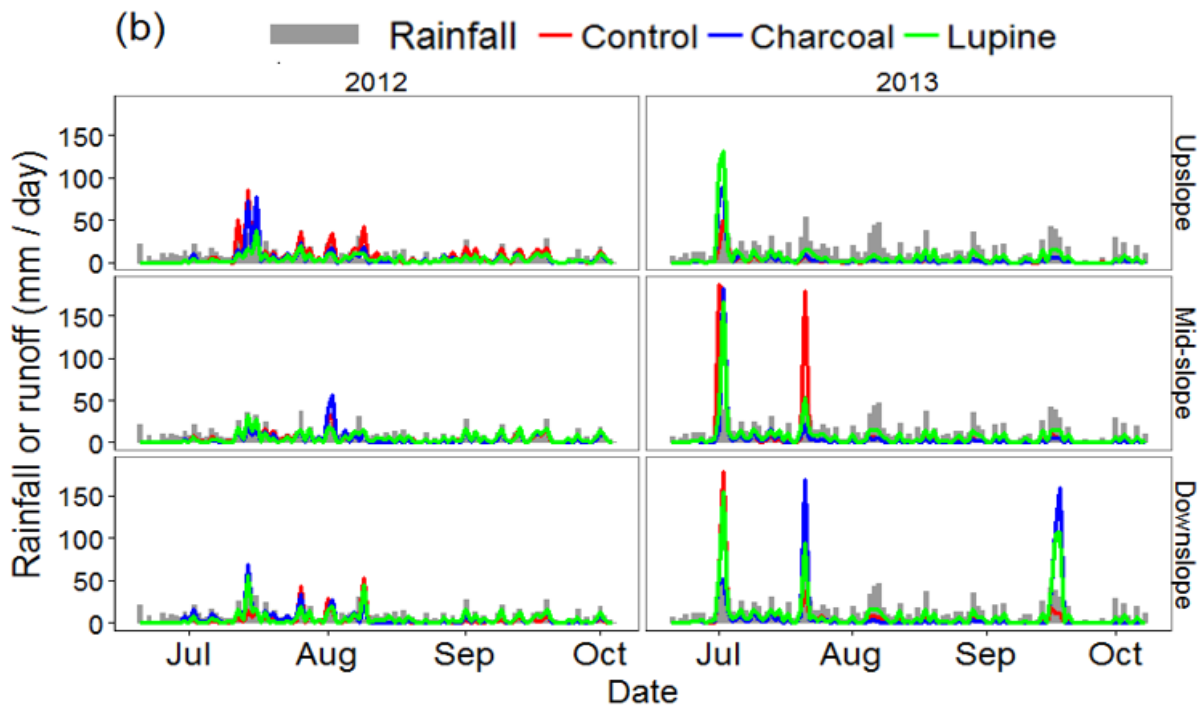

4

5 Figure S3. Daily rainfall versus runoff from plots along Transect 2



1 **Supplementary material C: Aggregated Plot Runoff Response**

2

3

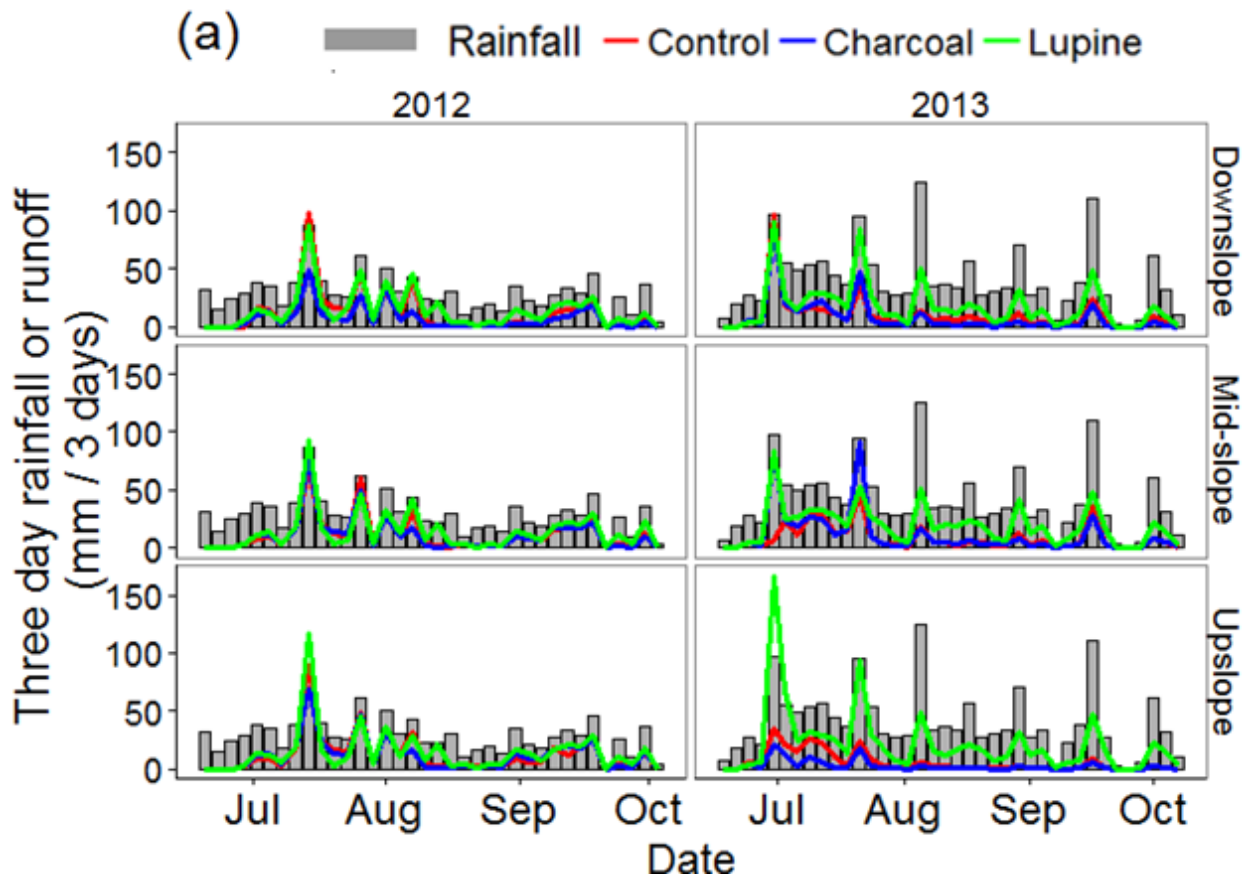

4

(b) Rainfall Control Charcoal Lupine

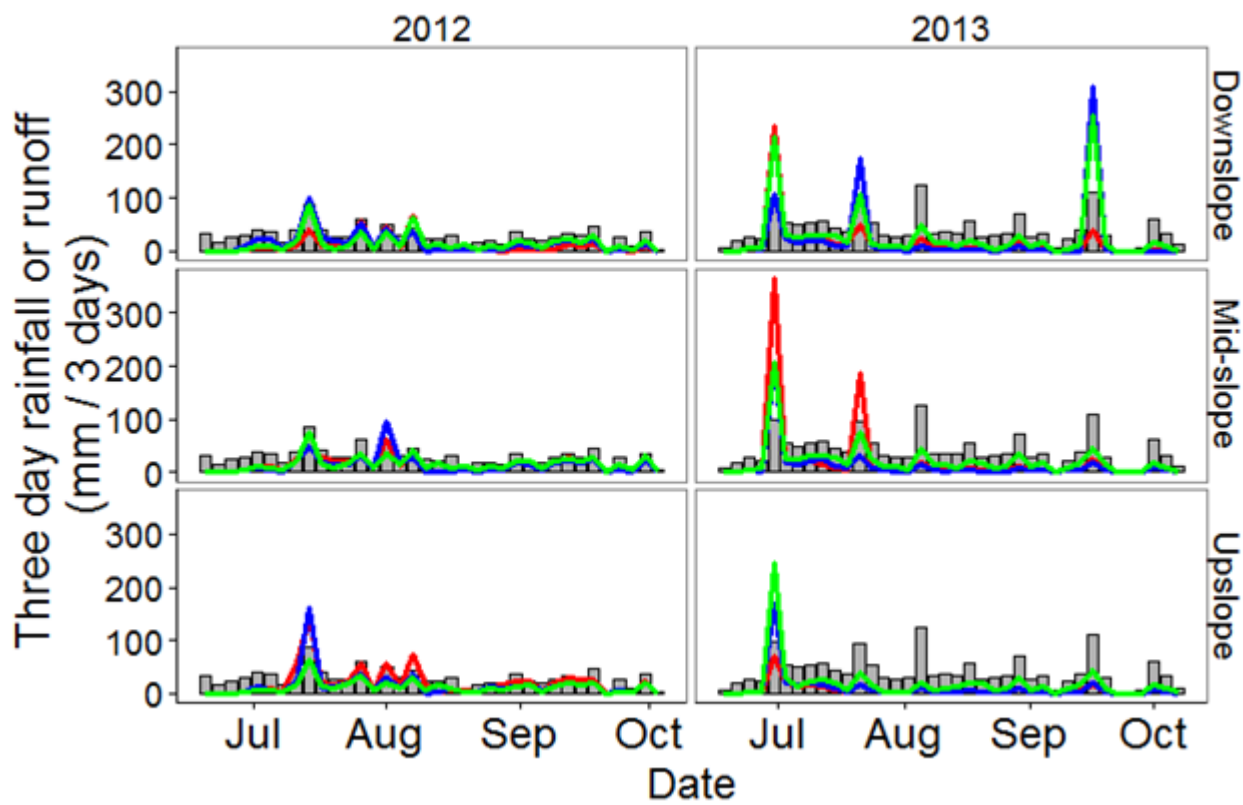

1

2

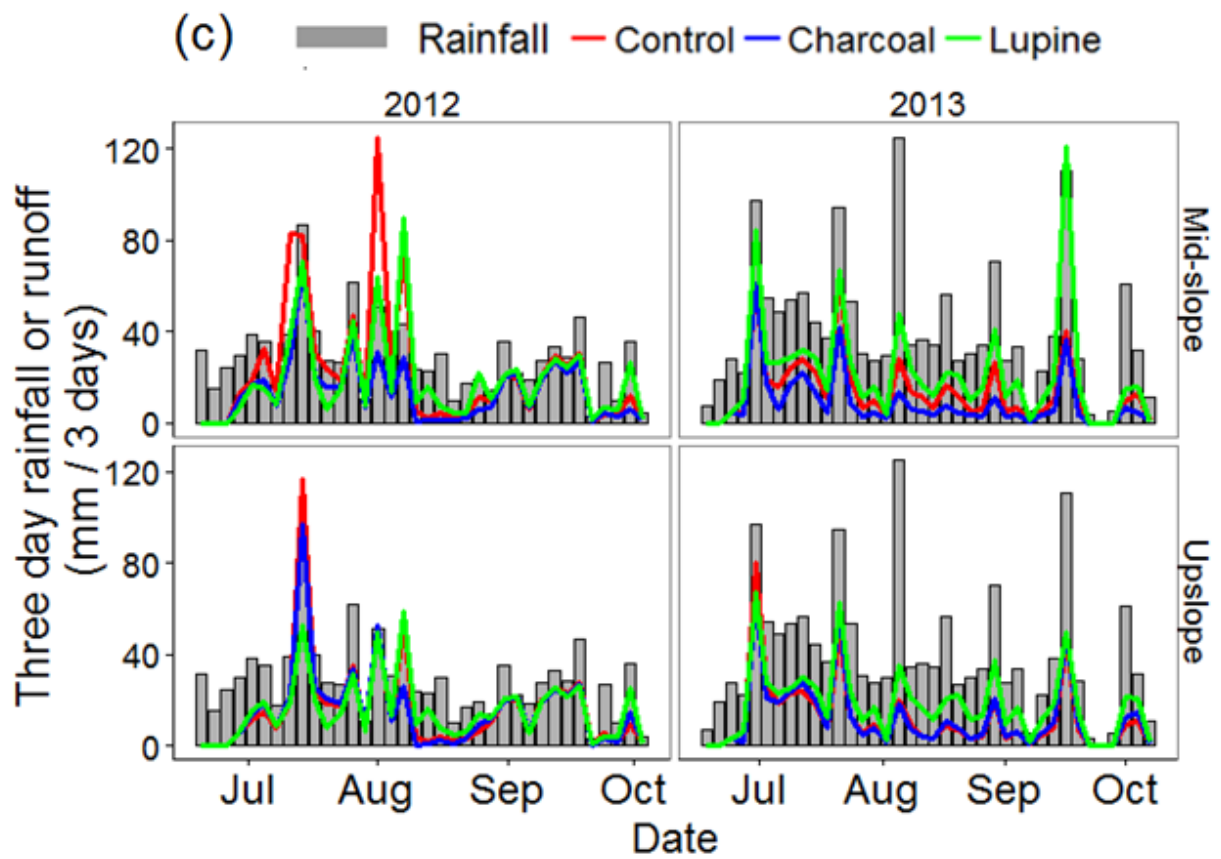

1

2 Figure S5. Three day rainfall and unadjusted three day runoff (aggregated on 3-day intervals)  
 3 for individual plots from different slope positions along Transect 1 (a), Transect 2 (b), and  
 4 Transect 3 (c)

5

6

7

8

9

10

11

12

13

1 **Supplementary material D: Monthly Rainfall Distribution during the Monsoon**  
2 **Season**

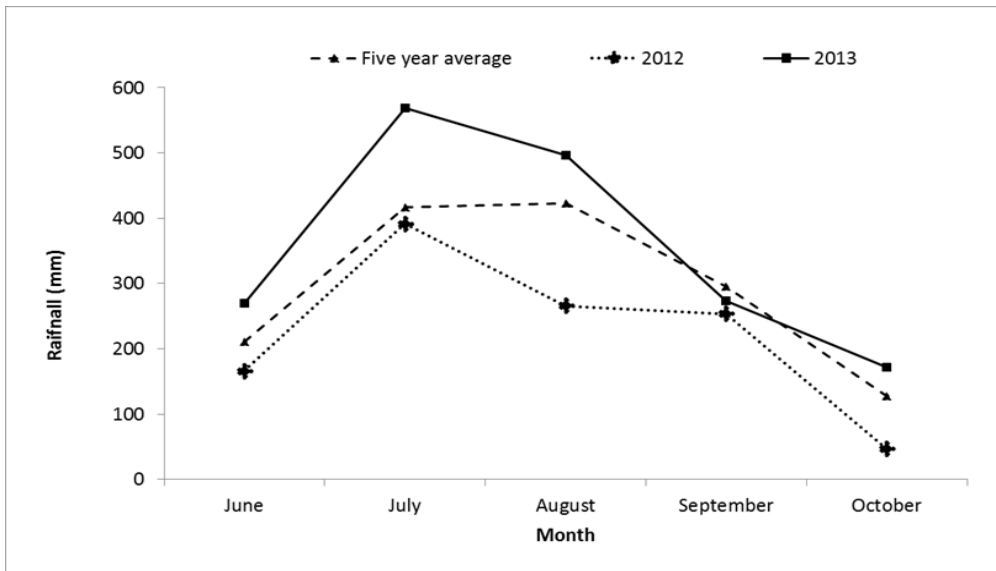

3

4 Figure S6. Monthly rainfall distribution during the monsoon period of 2012, 2013 and 5-  
5 year average

6



1 **Supplementary material E: Runoff response between transects**

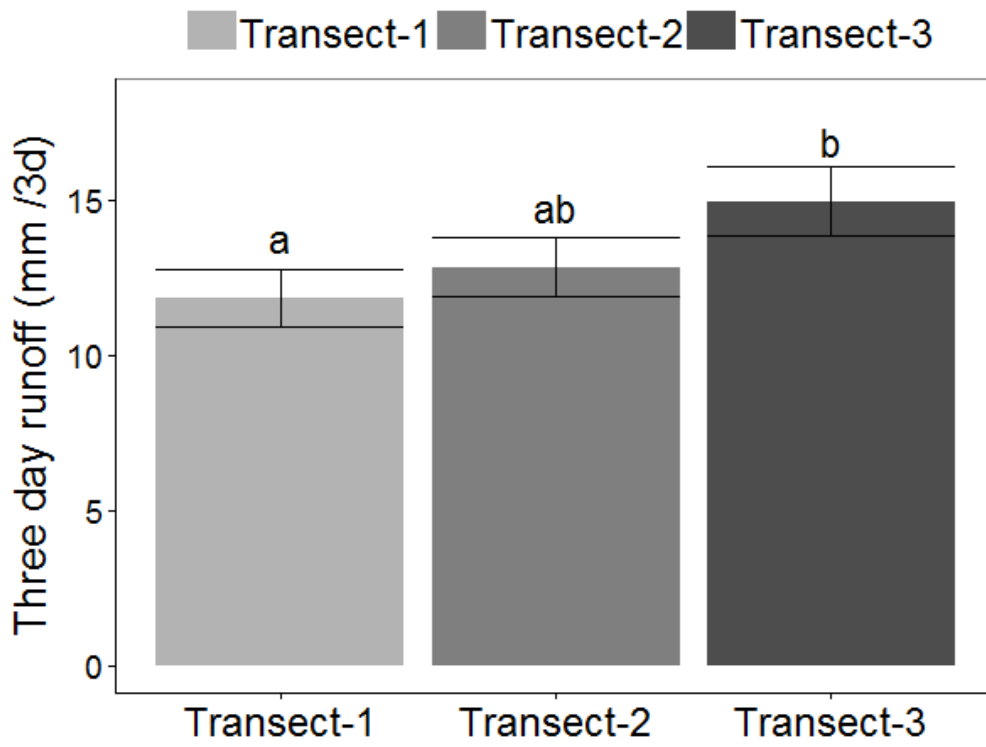

2

3 Figure S7. Runoff responses between transects. Transects not sharing the same letter  
4 are statically significant at  $p < 0.05$ .

5

1 **Supplementary material F: Lupine crop root**

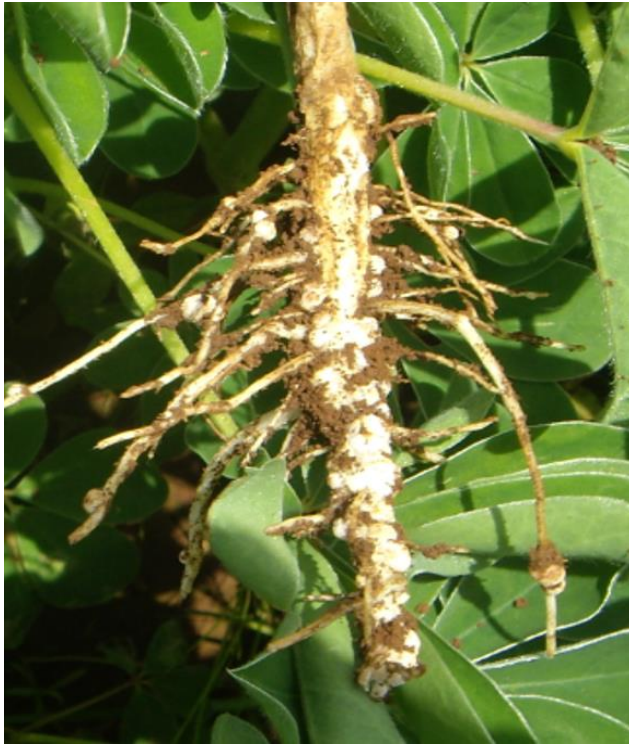

2

3 Figure S8. Lupine crop root morphology

4 **Supplementary material G: Soil moisture content**

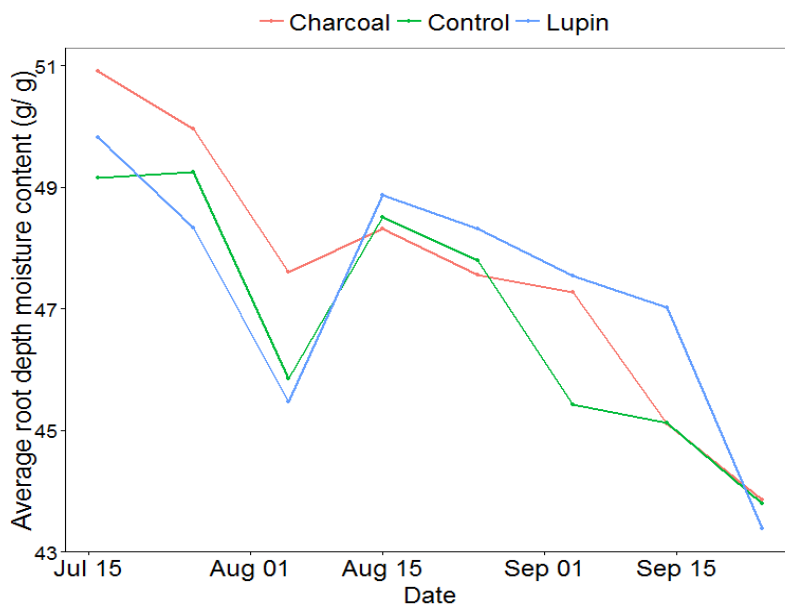

5

6 Figure S9. Average root depth gravimetric moisture content of plots with different treatment

7
